# Supplementary material for: Predictability of mean summertime diurnal winds over ungauged mountain glaciers
Source: Copernicus journal article supplement (doi:10.5194/egusphere-2025-3756), 2025-09-12
Supplement: Supplementary file 1 [file egusphere-2025-3756-supplement.pdf]

# Supplement to “Predictability of mean summertime diurnal winds over ungauged mountain glaciers”

J Krishnanand<sup>1</sup>, Argha Banerjee<sup>1</sup>, R. Shankar<sup>2</sup>, Himanshu Kaushik<sup>3</sup>, Mohd. Farooq Azam<sup>3</sup>, and Chandan Sarangi<sup>4</sup>

<sup>1</sup>Earth and Climate Science, Indian Institute of Science Education and Research Pune, Maharashtra, India

<sup>2</sup>The Institute of Mathematical Sciences, Chennai, Tamil Nadu, India

<sup>3</sup>Department of Civil Engineering, Indian Institute of Technology Indore, Madhya Pradesh, India

<sup>4</sup>Department of Civil Engineering, Indian Institute of Technology Madras, Tamil Nadu, India

**Correspondence:** Argha Banerjee (argha@iiserpune.ac.in)

## Text S1. Relationship between Eq. 1 and linear response

We define the Fourier transform of a time-domain function  $f(t)$  as:

$$\hat{f}(\omega) = \int_{-\infty}^{\infty} f(t)e^{i\omega t} dt. \quad (\text{S1})$$

The linear-response model, which assumes that the variation in glacier wind speed is a linear response to the diurnal variation of temperature, is given by:

$$u_d + \tau_0 \frac{d}{dt} u_d = s T_d. \quad (\text{S2})$$

While the present empirical model (Eq. 1) assumes the following relation:

$$u_d + s\tau \frac{d}{dt} T_d = s T_d. \quad (\text{S3})$$

The symbols  $s_0$  and  $\tau_0$  above denote the sensitivity of the wind to temperature forcing and the response time, respectively, for the linear-response model. Note that these two parameters are in general different from the corresponding sensitivity  $s$  and response time  $\tau$  in the empirical model, in general. Taking Fourier transform on both sides of this equation (Eq. S2), we obtain:

$$(1 - i\omega\tau_0)\hat{u}_d = s_0\hat{T}_d \quad (\text{S4})$$

$$\implies \hat{u}_d = \frac{s_0}{(1 - i\omega\tau_0)}\hat{T}_d. \quad (\text{S5})$$

$$\implies \hat{u}_d = \frac{s_0}{(1 + \omega^2\tau_0^2)}(1 + i\omega\tau_0)\hat{T}_d. \quad (\text{S6})$$

In the limit of  $\omega^2\tau_0^2 \ll 1$ , this form is similar to the one obtained by taking Fourier transform on both sides of equation S3):

$$\hat{u}_d = s(1 + i\omega\tau)\hat{T}_d. \quad (\text{S7})$$

For the mean hourly summer temperature and wind speed considered here, the dominant frequency is  $\omega = 2\pi/24$  hours. Given that the response time  $\tau \approx 1$  hr, we are in this low-frequency limit. Thus, for the problem of mean diurnal variability of wind speed addressed here, our empirical model (Equation S4) is equivalent to the linear response model (Eq. S3).

## 20 **Text S2. Top three multilinear regressions for predicting model parameters $s$ , $\tau$ , and $\bar{u}$**

As discussed in Sect. 5.2, the top three best performing multilinear regressions to obtain the model parameters are as follows:

The best model with  $\text{RMSE} = 0.686 \text{ ms}^{-1}$ :

$$\bar{u} = (2.50 \pm 0.51) + (4.52 \pm 0.80) \times 10^{-3} R_1 - (1.57 \pm 0.25) \times 10^{-3} R_5 + (0.11 \pm 0.02) \text{AR}_{\sigma,1} \quad (\text{S8})$$

$$s = (0.13 \pm 0.09) - (1.69 \pm 0.54) \times 10^{-4} Z_s + (2.17 \pm 0.60) \times 10^{-4} \bar{Z}_{10} \quad (\text{S9})$$

$$25 \quad \tau = (0.73 \pm 0.49) + (1.93 \pm 1.45) S_{0.1} \quad (\text{S10})$$

$$(\text{S11})$$

The second-best model with  $\text{RMSE} = 0.687 \text{ ms}^{-1}$ :

$$\bar{u} = (2.50 \pm 0.51) + (4.52 \pm 0.80) \times 10^{-3} R_1 - (1.57 \pm 0.25) \times 10^{-3} R_5 + (0.11 \pm 0.02) \text{AR}_{\sigma,1} \quad (\text{S12})$$

$$s = (0.13 \pm 0.09) - (1.69 \pm 0.54) \times 10^{-4} Z_s + (2.17 \pm 0.60) \times 10^{-4} \bar{Z}_{10} \quad (\text{S13})$$

$$30 \quad \tau = (1.95 \pm 0.77) - (1.46 \pm 1.54) \times 10^{-3} \sigma_5 \quad (\text{S14})$$

$$(\text{S15})$$

The third-best model with  $\text{RMSE} = 0.690 \text{ ms}^{-1}$ :

$$\bar{u} = (2.50 \pm 0.51) + (4.52 \pm 0.80) \times 10^{-3} R_1 - (1.57 \pm 0.25) \times 10^{-3} R_5 + (0.11 \pm 0.02) \text{AR}_{\sigma,1} \quad (\text{S16})$$

$$s = (0.13 \pm 0.09) - (1.69 \pm 0.54) \times 10^{-4} Z_s + (2.17 \pm 0.60) \times 10^{-4} \bar{Z}_{10} \quad (\text{S17})$$

$$35 \quad \tau = (1.36 \pm 0.47) - (0.01 \pm 0.03) L \quad (\text{S18})$$

$$(\text{S19})$$

The static variables used in the above equations are described in Supplementary Table S2. Eqs. S10–S12 above is the same Eqs. 7–9 in the main text. Note that no climatic variable appear among the predictors in the top 10 models.

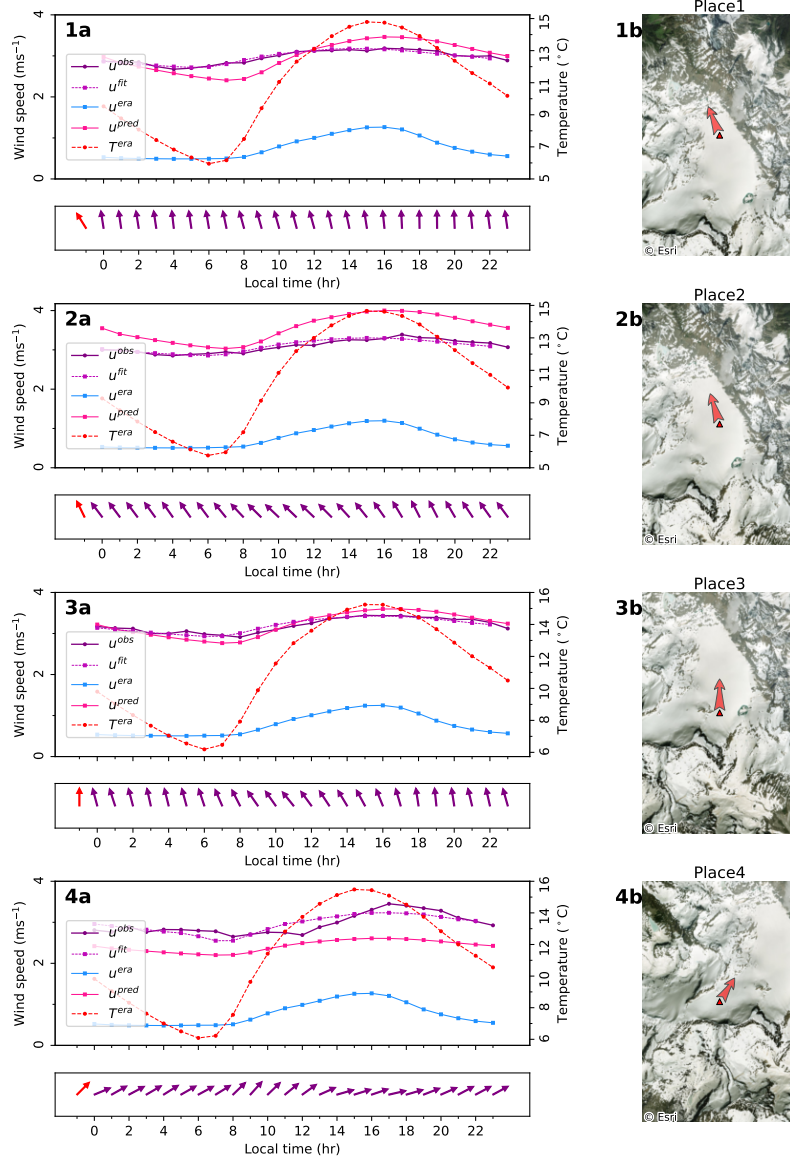

**Supplementary Figure S1 .** Comparison of model predictions with observations for each of the 28 stations. a) Here  $u^{obs}$  denotes the mean hourly values of observed wind speed,  $u^{fit}$  denotes the result of fitting Eq. 1 to observations,  $T^{era}$  is the ERA5L temperature,  $u^{pred}$  denotes the wind speeds predicted using Eqs. 1, 7–9, and ERA5L derived 10m-winds are shown as  $u^{era}$ . The purple arrows in the panel below denote the hourly averaged wind vectors for the station, with wind blowing to the north being denoted by an upward arrow. Arrow lengths were rescaled separately for each station so that variations across hours are visible; thus, their lengths are not comparable between stations. The red arrow denotes down-glacier direction which was determined visually from Google Earth. b) The location of weather station (red triangle) on an image of the glacier. The red arrow denotes the down valley direction, which was determined manually. Image Source: Esri, i-cubed, USDA, USGS, AEX, GeoEye, Getmapping, Aerogrid, IGN, IGP, UPR-EGP, and the GIS User Community.

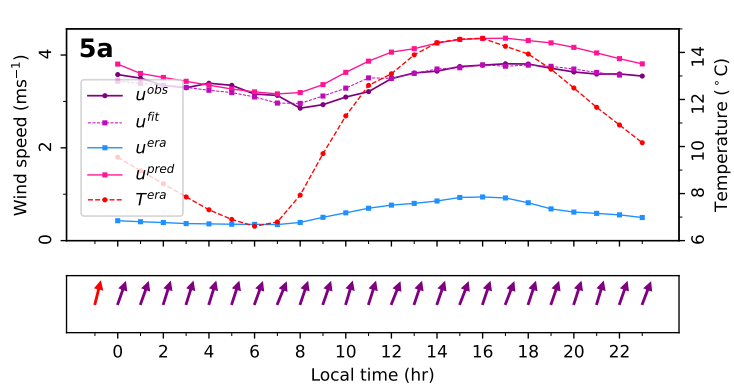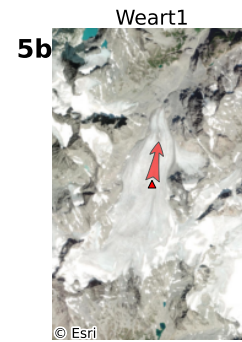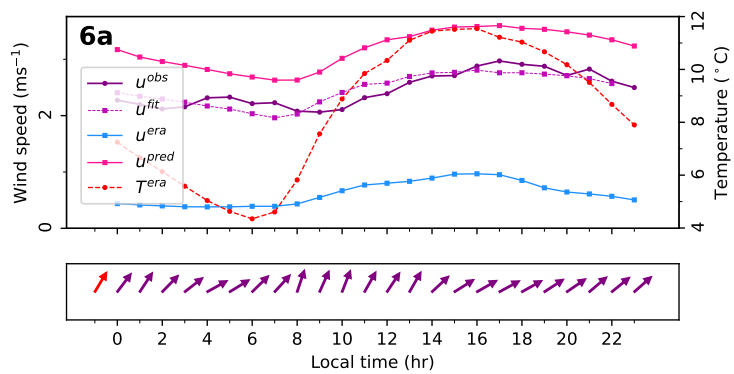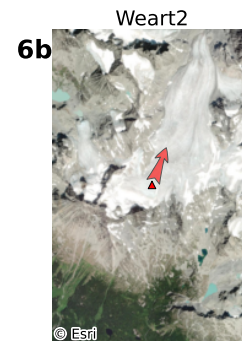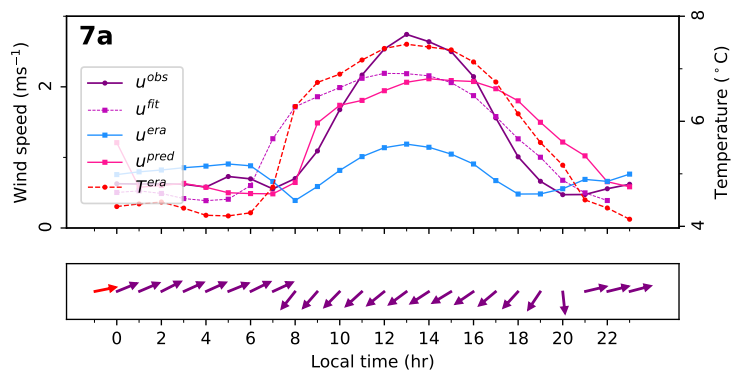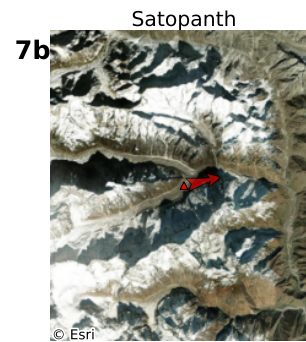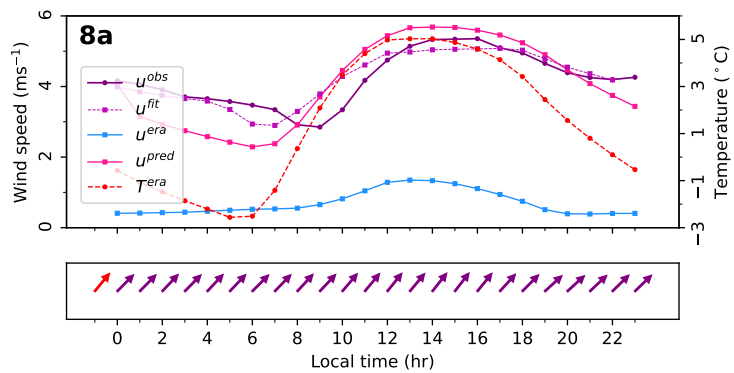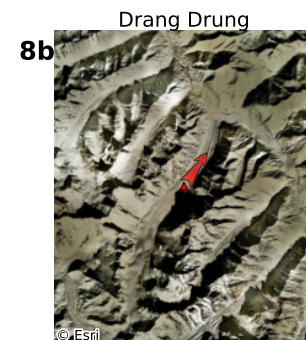

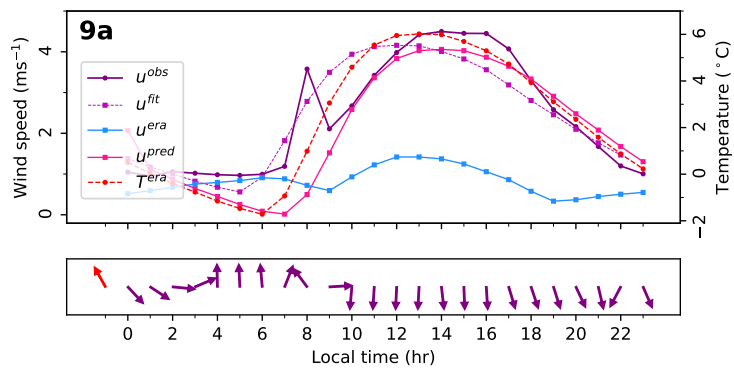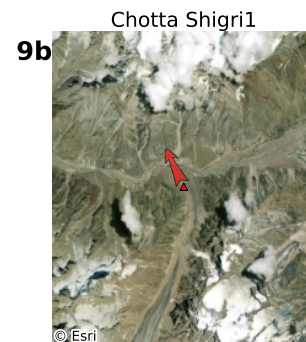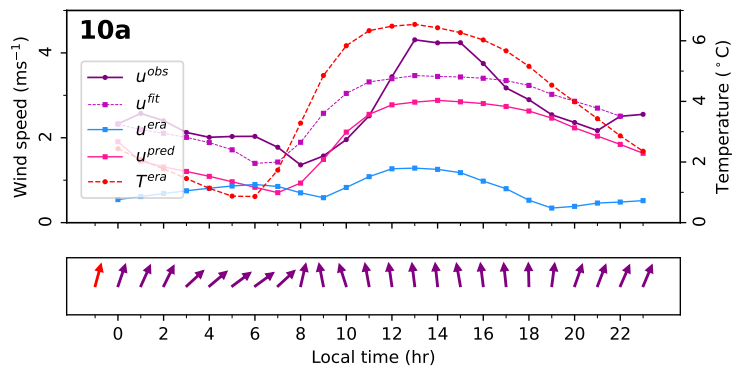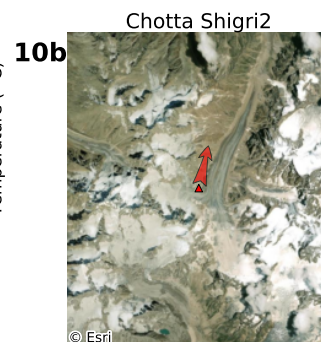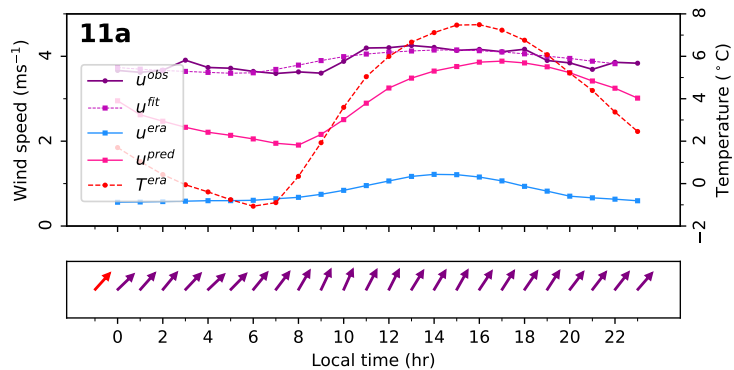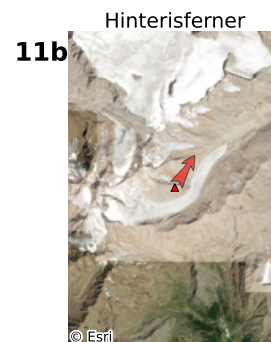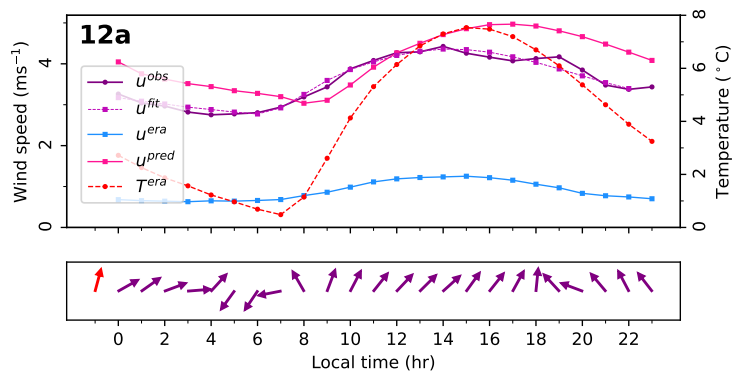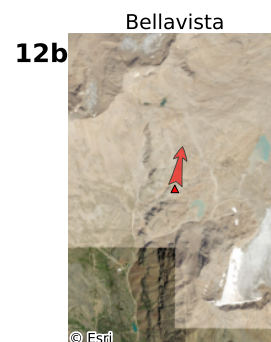

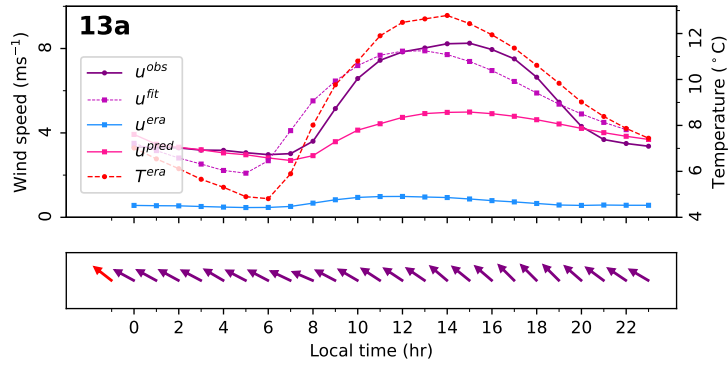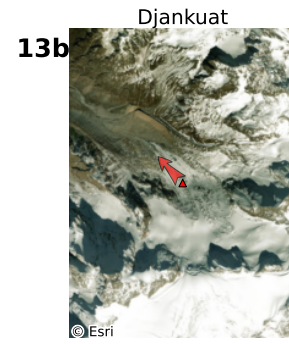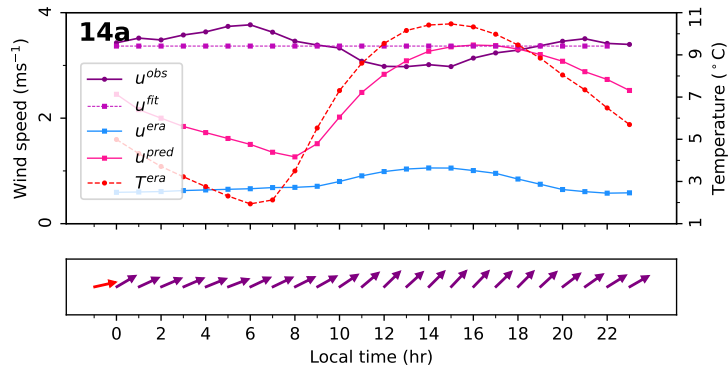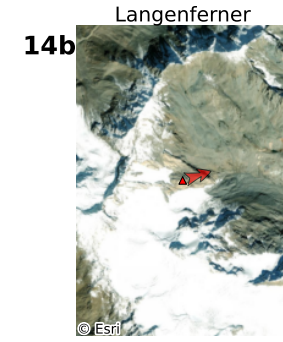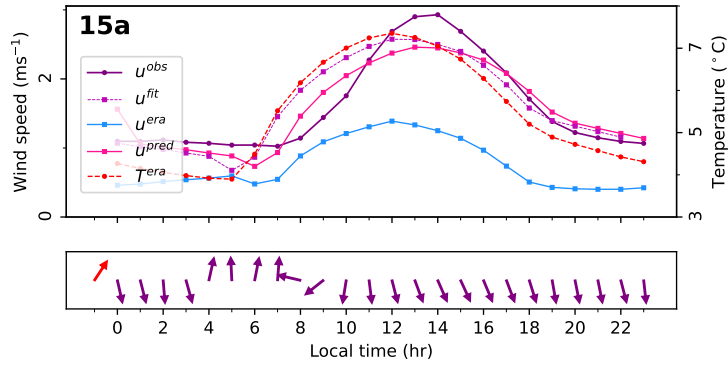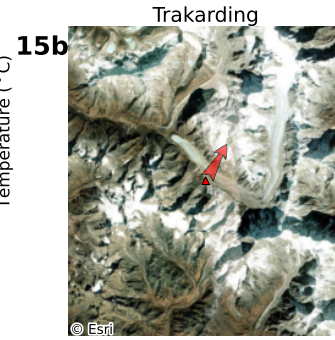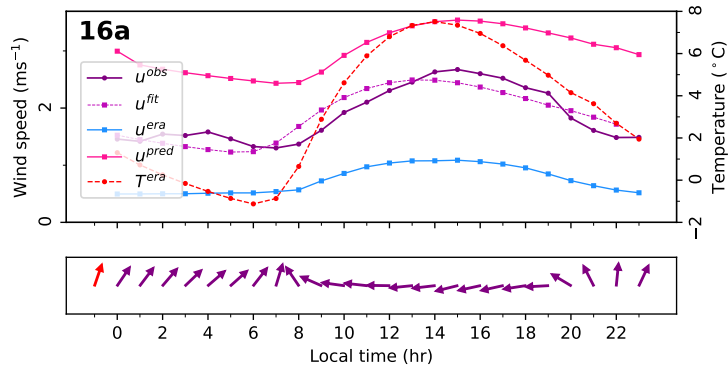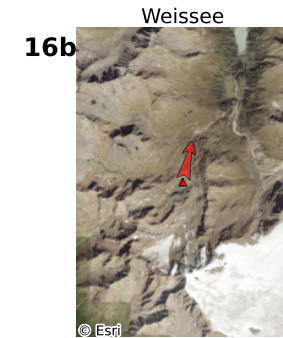



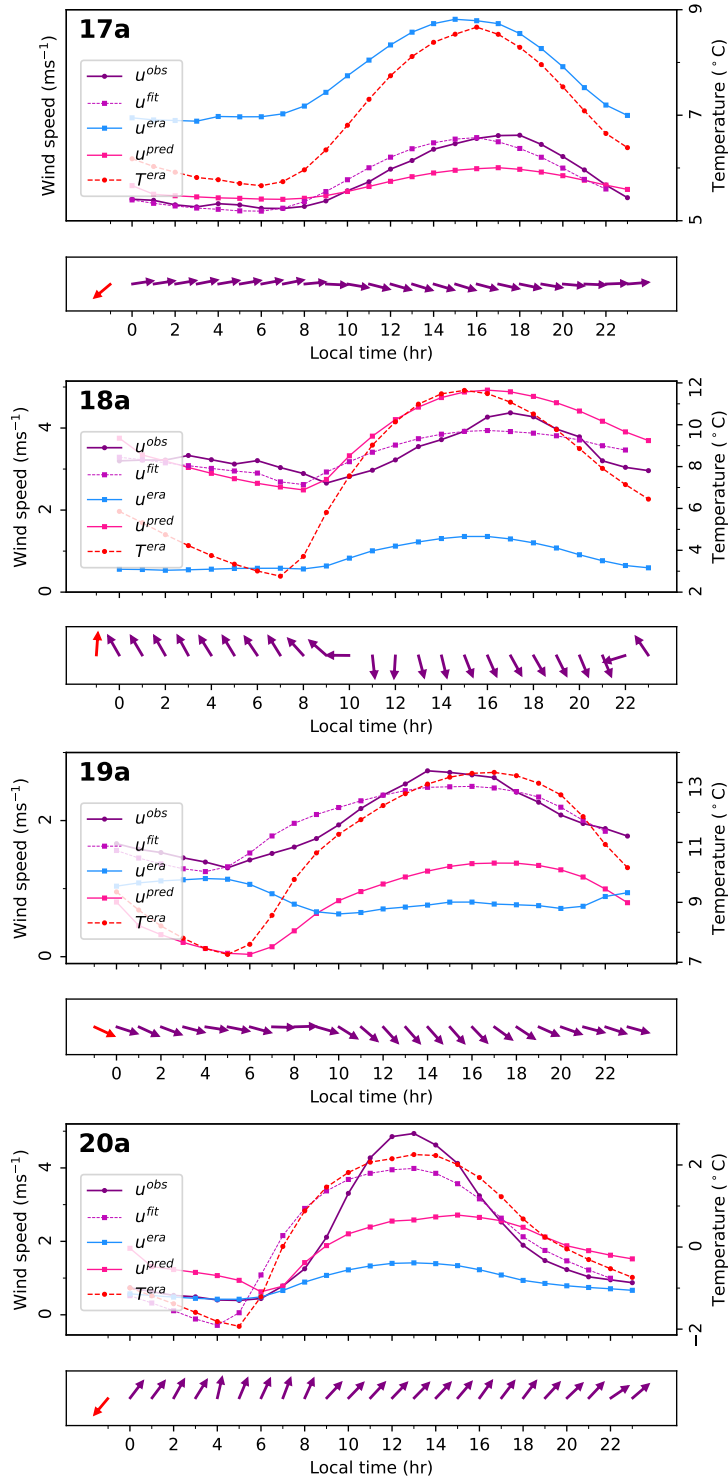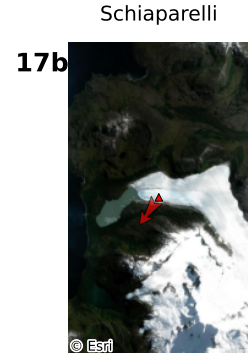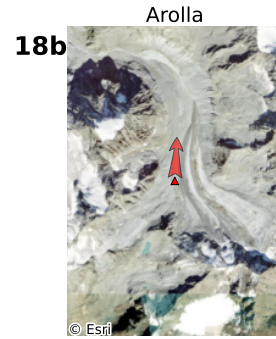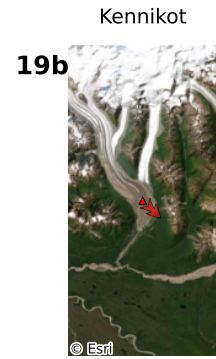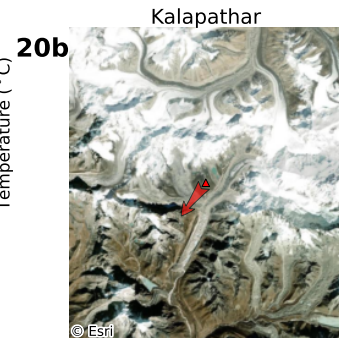

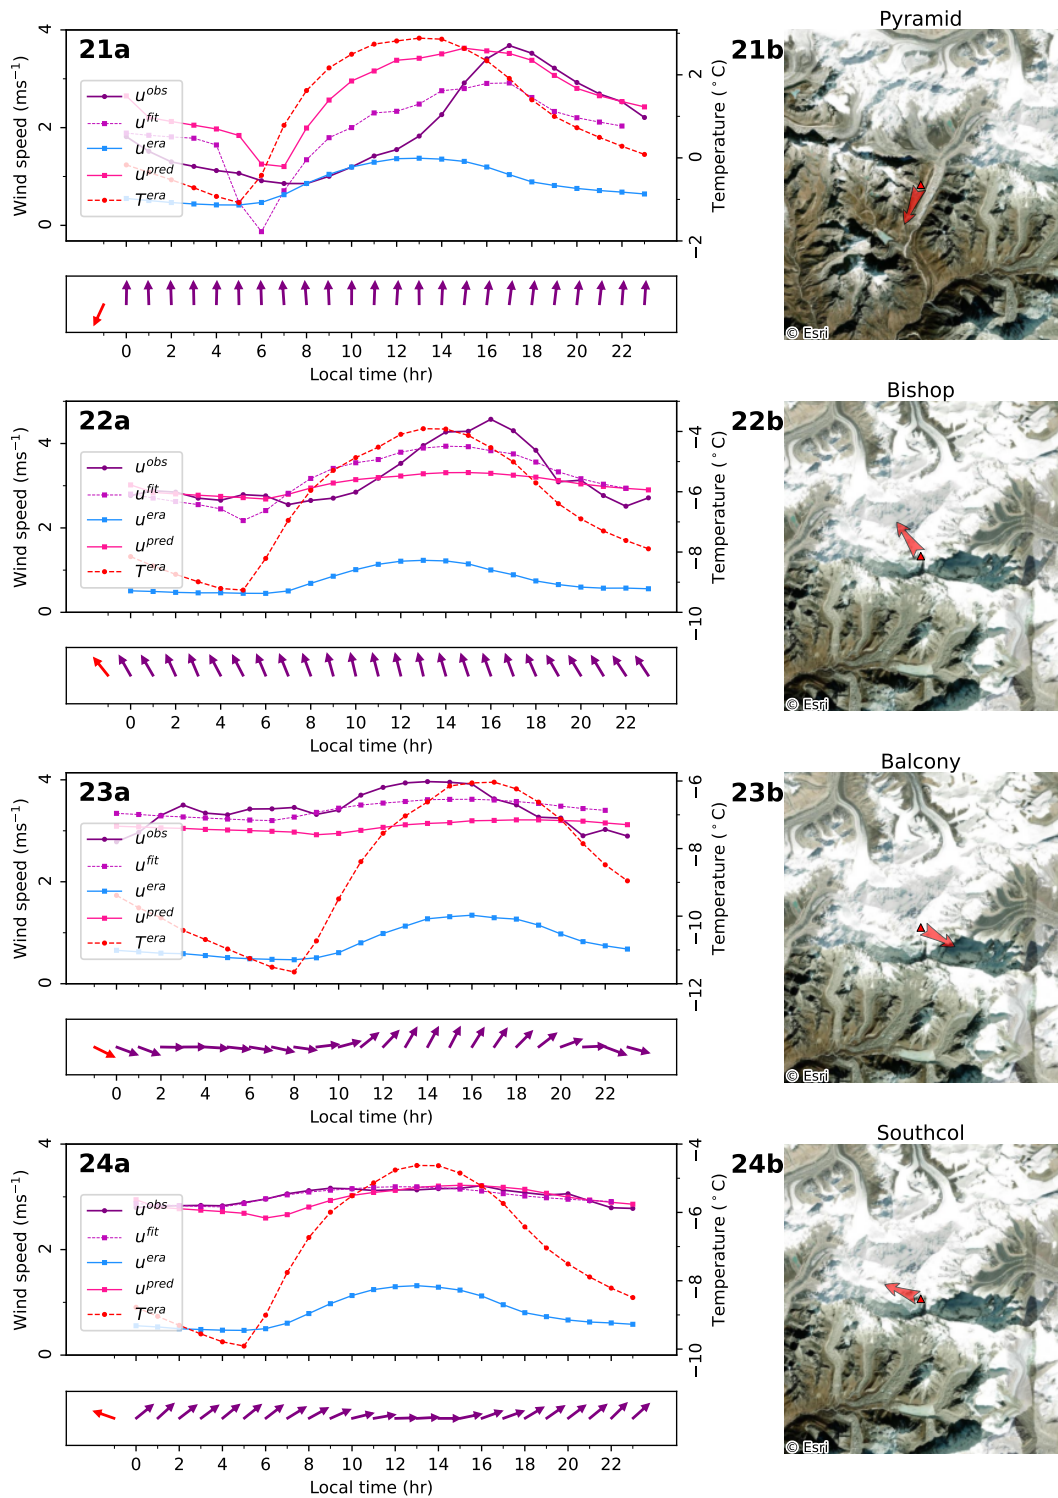



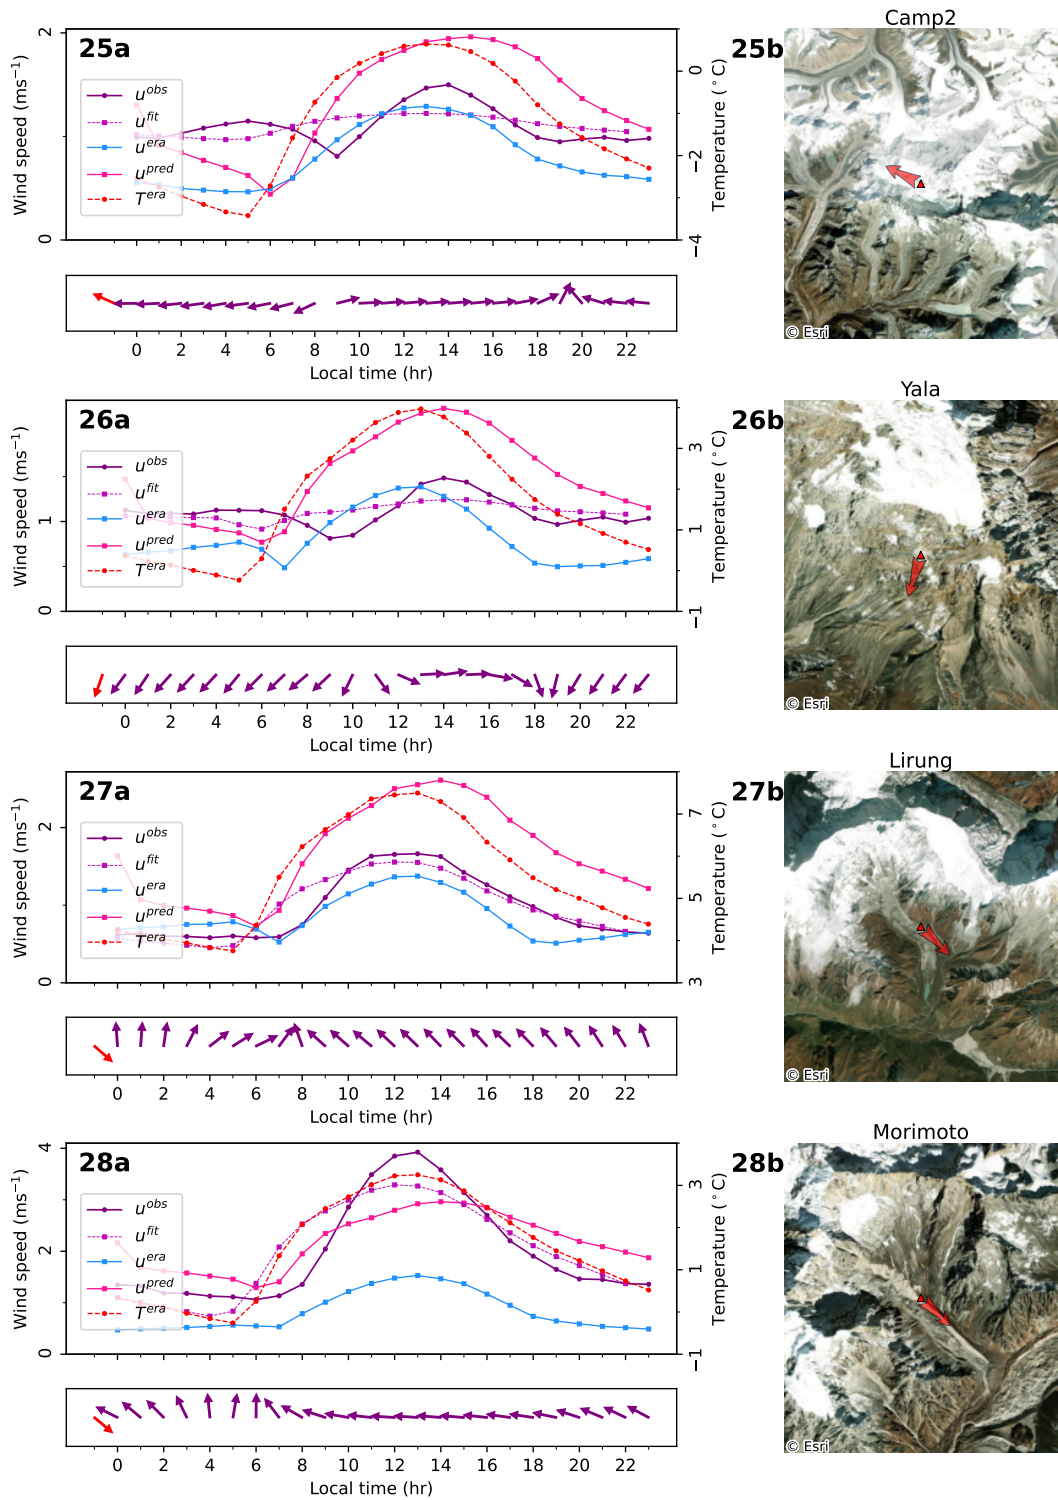

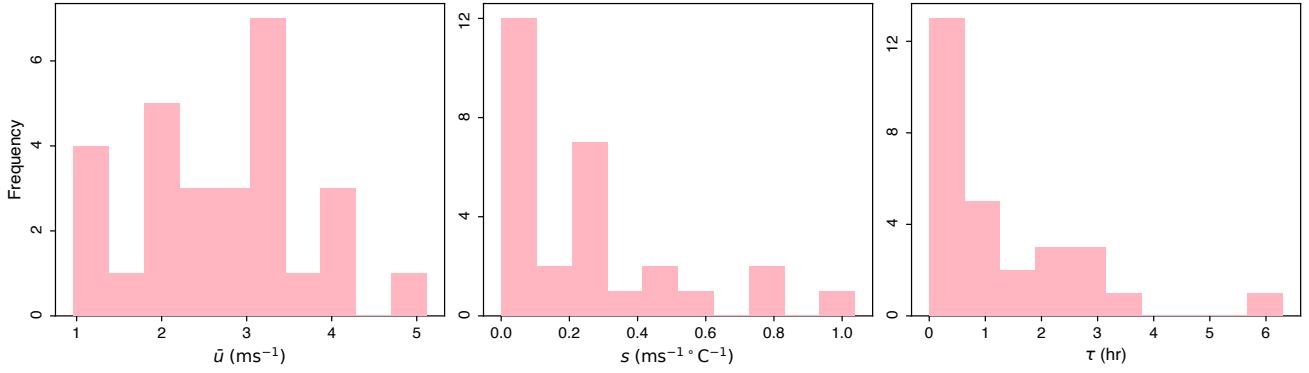

**Supplementary Figure S2 .** Distribution of model parameters mean wind speed  $\bar{u}$ , sensitivity of wind speed variation to temperature  $s$  and response time  $\tau$  obtained through fitting Eq. 1 to observations in all 28 stations (main text, section 3.2.1).

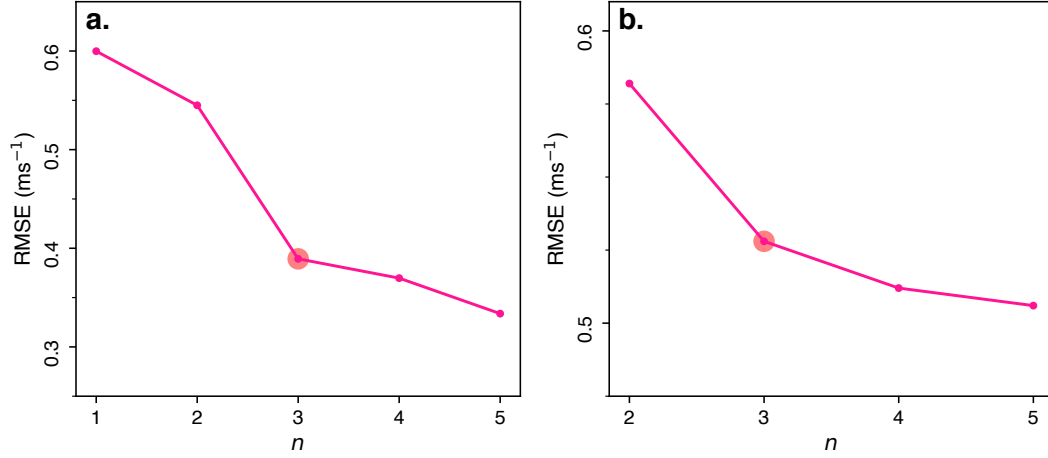

**Supplementary Figure S3 .** Determination of the optimal number of static variables used in Eqs. 2–4 (main text, section 3.2.2): a) The RMSE of  $\bar{u}$  prediction (Eq. 2) for the best  $n$ -variable regression model shows that the improvement at  $2 \rightarrow 3$  is larger than that at  $3 \rightarrow 4$ . Therefore a  $n = 3$  (highlighted with a bigger red circle) model was chosen. b) The RMSE of  $u_d$  prediction (Eqs. 2–3) for the best  $n$ -variable regression model also led to a  $n = 3$  model, following the same criterion.

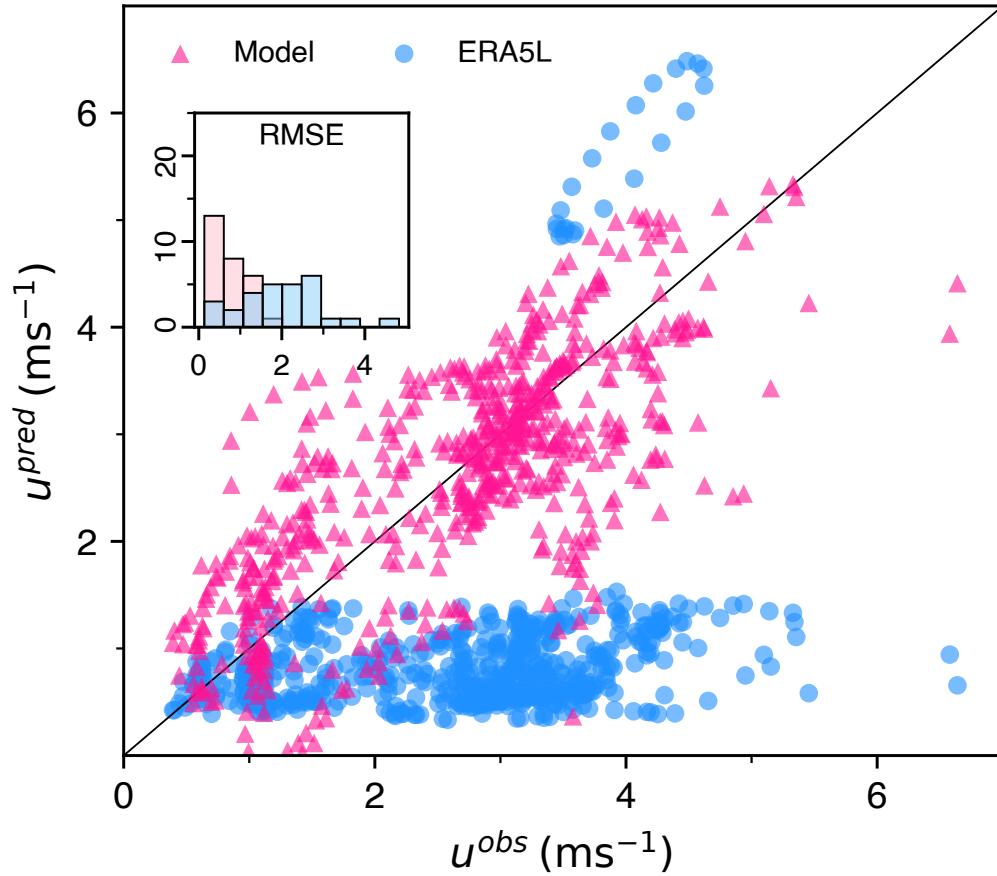

**Supplementary Figure S4 .** (a) The result of LOOCV (main text, section 4.2.2): For each of the 28 left-out stations, the predicted  $u$  is compared to the corresponding observed values. The ERA5L wind speeds for the left-out stations are also shown (blue solid circles). The inset shows the distribution of the 28 RMSEs of the wind speeds predicted for the left-out station by the calibrated model (shown as light pink histogram) and ERA5 (shown as light blue histogram).

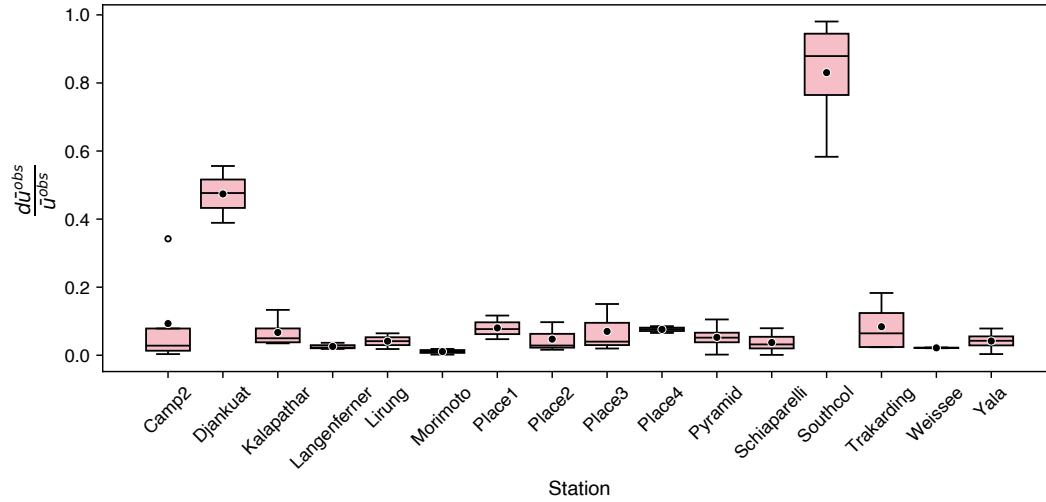

**Supplementary Figure S5 .** For the stations with more than one year of data, the box-plot shows the distribution of fractional absolute deviations  $d\bar{u}/\bar{u}$  across different years. South Col station has the highest inter-annual mean wind speed variability. This is one among the three high-altitude stations (Balcony and Bishop are the other two) located near Mt. Everest, with possible influence of synoptic scale winds. Djankuat Glacier station, second among the two stations with the most inter-annual variability of mean wind speed, also has the highest observed mean wind speed among all stations. The winds in this station is predominantly katabatic. Djankuat is also the glacier with the largest inter-annual observed mean temperature variability.

**Supplementary Table S1 :** Information about glaciers and the weather station datasets used in this work, and the associated glaciers

| Station name, Data source              | Station Type | Period for which data was available (number of summer days) | Latitude, Longitude | Elevation (m) | Glacier length (km) | Glacier area (km <sup>2</sup> ) | Mean temperature (°C) | Mean wind (m/s) | Glacier type                  |
|----------------------------------------|--------------|-------------------------------------------------------------|---------------------|---------------|---------------------|---------------------------------|-----------------------|-----------------|-------------------------------|
| Arolla (Shaw, 2023)                    | On-glacier   | 2022-07-06 to 2022-09-18 (74 days)                          | 45.97, 7.52         | 2852          | 4.4                 | 3.8                             | 7.4                   | 3.4             | Debris-free valley glacier    |
| Balcony (Matthews and Coauthors, 2020) | Off-glacier  | 2019-06-01 to 2019-09-30 (122 days)                         | 27.9826, 86.9292    | 8323          | 18.5                | 26.4                            | -16.7                 | 3.4             | Debris-covered valley glacier |
| Bellavista (Strasser and Marke, 2017)  | Off-glacier  | 2015-07-27 to 2015-09-28 (64 days)                          | 46.78284, 10.79138  | 2799          | 3.2                 | 3.1                             | 4.3                   | 3.6             | Debris-free valley glacier    |
| Bishop (Matthews and Coauthors, 2020)  | Off-glacier  | 2022-06-01 to 2022-07-29 (59 days)                          | 27.9735, 86.9308    | 7857          | 18.5                | 26.4                            | -17.3                 | 3.2             | Debris-covered valley glacier |
| Camp2 (Matthews and Coauthors, 2020)   | On-glacier   | 2019-06-01 to 2023-07-01 (518 days)                         | 27.981, 86.9023     | 6485          | 18.5                | 26.4                            | -4.0                  | 1.1             | Debris-covered valley glacier |

|                                                 |             |                                     |                        |      |      |       |      |     |                                             |
|-------------------------------------------------|-------------|-------------------------------------|------------------------|------|------|-------|------|-----|---------------------------------------------|
| Chotta Shigri1 (Mandal et al., 2022)            | On-glacier  | 2022-08-16 to 2022-09-29 (56 days)  | 32.2858, 77.5305       | 3844 | 9.5  | 16.8  | 0.0  | 2.4 | Debris-free valley glacier                  |
| Chotta Shigri2 (Mandal et al., 2022)            | On-glacier  | 2022-06-07 to 2022-09-29 (86 days)  | 32.228297, 77.506293   | 4871 | 9.5  | 16.8  | 2.4  | 2.6 | Debris-free valley glacier                  |
| Djankuat (Rets and Popovnin, 2019)              | On-glacier  | 2007-06-17 to 2009-09-30 (231 days) | 43.198, 42.757         | 2976 | 3.2  | 3.0   | 7.0  | 5.1 | Partly debris-covered-valley glacier        |
| Drang Drung (This study)                        | On-glacier  | 2023-06-01 to 2023-09-23 (98 days)  | 33.787596, 76.333945   | 4601 | 24.7 | 68.4  | 5.5  | 4.2 | Lake-terminating Debris-free valley glacier |
| Hinterisferner (Stocker-Waldhuber et al., 2013) | Off-glacier | 2012-06-01 to 2012-09-30 (121 days) | 46.79867, 10.76042     | 3027 | 8.5  | 8.0   | 4.3  | 3.9 | Debris-free valley glacier                  |
| Kalapathar (EvK2CNR station)                    | Off-glacier | 2009-06-01 to 2012-09-30 (457 days) | 27.99, 86.83           | 5600 | 18.5 | 26.4  | 0.1  | 2.0 | Debris-covered valley glacier               |
| Kennikot (Buri et al., 2022)                    | On-glacier  | 2019-05-31 to 2019-08-21 (82 days)  | 61.4841, -142.9283     | 657  | 44.9 | 292.5 | 10.5 | 2.0 | Debris-covered valley glacier               |
| Langenferner (Galos, 2019)                      | Off-glacier | 2013-06-01 to 2015-08-27 (332 days) | 46.47245, 10.61391     | 2954 | 2.9  | 2.2   | 4.0  | 3.4 | Debris-free valley glacier                  |
| Lirung (ICIMOD and Utrecht University, 2020a)   | Off-glacier | 2018-06-01 to 2019-08-10 (186 days) | 28.24, 85.56           | 4276 | 8.6  | 4.8   | 8.1  | 1.0 | Debris-covered valley glacier               |
| Morimoto (ICIMOD and Utrecht University, 2020b) | Off-glacier | 2017-06-01 to 2019-09-30 (365 days) | 28.25296, 85.68152     | 4925 | 4.6  | 1.4   | 3.4  | 2.0 | Debris-covered valley glacier               |
| Place1 (Shea, 2010)                             | On-glacier  | 2006-08-04 to 2008-08-12 (206 days) | 50.426073, -122.601628 | 1970 | 3.8  | 3.0   | 4.7  | 3.0 | Debris-free valley glacier                  |
| Place2 (Shea, 2010)                             | On-glacier  | 2006-08-04 to 2008-09-28 (266 days) | 50.421835, -122.598482 | 2025 | 3.8  | 3.0   | 4.5  | 3.1 | Debris-free valley glacier                  |
| Place3 (Shea, 2010)                             | On-glacier  | 2006-08-04 to 2008-08-31 (241 days) | 50.414718, -122.600217 | 2095 | 3.8  | 3.0   | 5.2  | 3.2 | Debris-free valley glacier                  |
| Place4 (Shea, 2010)                             | On-glacier  | 2006-08-04 to 2008-08-25 (189 days) | 50.412846, -122.615898 | 2330 | 3.8  | 3.0   | 4.3  | 2.9 | Debris-free valley glacier                  |
| Pyramid (EvK2CNR station)                       | Off-glacier | 2009-06-01 to 2012-09-29 (473 days) | 27.95792, 86.814807    | 5050 | 18.5 | 26.4  | 2.1  | 2.0 | Debris-covered valley glacier               |
| Satopanth (This study)                          | On-glacier  | 2017-06-29 to 2017-09-29 (92 days)  | 30.773251, 79.408794   | 3910 | 20.1 | 57.0  | 9.7  | 1.2 | Debris-covered valley glacier               |
| Schiaparelli (Arigony-Neto et al., 2023)        | On-glacier  | 2016-05-31 to 2020-09-09 (586 days) | -54.4, -70.87          | 197  | 10.8 | 24.8  | 7.1  | 3.9 | Lake-terminating Debris-free glacier        |

|                                          |             |                                     |                        |      |      |      |       |      |                               |
|------------------------------------------|-------------|-------------------------------------|------------------------|------|------|------|-------|------|-------------------------------|
| Southcol (Matthews and Coauthors, 2020)  | Off-glacier | 2019-06-01 to 2023-07-04 (419 days) | 27.9719, 86.9295       | 7905 | 18.5 | 26.4 | -13.4 | 3.07 | Debris-covered valley glacier |
| Trakarding (Fujita, Sunako, Sakai, 2021) | Off-glacier | 2016-06-01 to 2019-09-29 (487 days) | 27.843, 86.487         | 4821 | 17.9 | 32.1 | 4.6   | 1.6  | Debris-covered valley glacier |
| Weart1 (Shea, 2010)                      | On-glacier  | 2007-07-10 to 2007-09-06 (58 days)  | 50.155944, -122.760257 | 2164 | 6.5  | 8.1  | 4.0   | 3.5  | Debris-free valley glacier    |
| Weart2 (Shea, 2010)                      | On-glacier  | 2007-07-10 to 2007-09-06 (58 days)  | 50.138823, -122.775232 | 2298 | 6.5  | 8.1  | 4.8   | 2.5  | Debris-free valley glacier    |
| Weissee (Stocker-Waldhuber et al., 2022) | Off-glacier | 2017-06-01 to 2018-09-30 (243 days) | 46.872909, 10.714437   | 3507 | 7.8  | 16.7 | 7.5   | 1.9  | Debris-free valley glacier    |
| Yala (ICIMOD, 2016)                      | Off-glacier | 2016-06-01 to 2019-09-30 (464 days) | 28.23, 85.62           | 5214 | 2.2  | 2.1  | 1.2   | 1.1  | Debris-free cirque glacier    |

**Supplementary Table S2 :** Description of static variables used in section 3.1.2. Here, ALOS World 3d refers to the 30-m resolution digital elevation model from Tadono et al. (2014), GEE refers to Google Earth Engine (Gorelick et al., 2017), RGI7 refers to the Randolph Glacier Inventory 7 (RGI7.0-Consortium, 2023) and QGIS refers to the Geographic Information System (GIS) application (QGIS Development Team, 2024)

| Symbol           | Description                                                                                                     | Unit            | Source             |
|------------------|-----------------------------------------------------------------------------------------------------------------|-----------------|--------------------|
| $A_g$            | Area of glacier                                                                                                 | km <sup>2</sup> | RGI 7              |
| $AR_{\sigma,x}$  | The ratio of $\sigma_x$ to $W_c$ . <sup>1</sup>                                                                 | unitless        | QGIS               |
| $AR_{R,x}$       | The ratio of height scale of the valley cross section to its width scale.                                       | unitless        | GEE,RGI7, and QGIS |
| $D_c$            | Perpendicular distance from station to centerline                                                               | km              | RGI7,QGIS          |
| $\overline{D}_c$ | Perpendicular distance from station to centerline, normalised with glacier width at the station location        | unitless        | RGI7 and QGIS      |
| $D_h$            | Distance from station to higher tip of centerline measured along the centerline                                 | km              | RGI7 and QGIS      |
| $\overline{D}_h$ | Distance from station to higher tip of centerline measured along the centerline, normalised with glacier length | unitless        | RGI7 and QGIS      |
| $D_t$            | Distance from station to lower tip of centerline measured along the centerline                                  | km              | RGI7 and QGIS      |
| $\overline{D}_t$ | Distance from station to lower tip of centerline measured along the centerline, normalised with glacier length  | unitless        | RGI7 and QGIS      |
| $K$              | Continentality index, difference between maximum and minimum of monthly averaged temperature                    | °C              | ERA5L              |



|                 |                                                                                          |          |                                   |
|-----------------|------------------------------------------------------------------------------------------|----------|-----------------------------------|
| $K_C$           | Latitude corrected continentality index (Conrad, 1946), derived from ERA5 data.          | unitless | ERA5L                             |
| $L$             | Length of glacier                                                                        | km       | RGI7                              |
| $R_1$           | Difference between maximum and minimum elevation inside 1 km circular buffer of station  | km       | GEE and ALOS World 3D             |
| $R_1$           | Difference between maximum and minimum elevation inside 5 km circular buffer of station  | km       | GEE and ALOS World 3D             |
| $R_5$           | Difference between maximum and minimum elevation inside 10 km circular buffer of station | km       | GEE and ALOS World 3D             |
| $R_{10}$        | Difference between maximum and minimum elevation inside 20 km circular buffer of station | km       | GEE and ALOS World 3D             |
| $S_{0.1}$       | Slope of 100 m resolution topography at station location                                 | degrees  | GEE and ALOS World 3D             |
| $S_1$           | Slope of 1 km resolution topography at station location                                  | degrees  | GEE and ALOS World 3D             |
| $S_{10}$        | Slope of 10 km resolution topography at station location                                 | degrees  | GEE and ALOS World 3D             |
| $S^{rgi}$       | Slope of glacier                                                                         | degrees  | RGI7                              |
| $\sigma_1$      | Standard deviation of elevations around 1 km square buffer of station                    | m        | GEE and ALOS World 3D             |
| $\sigma_5$      | Standard deviation of elevations around 10 km circular buffer of station                 | m        | GEE v ALOS World 3D               |
| $\sigma_{10}$   | Standard deviation of elevations around 100 km circular buffer of station                | m        | GEE and ALOS World 3D             |
| $\bar{T}^{era}$ | Mean summer months (JJAS) temperature of station derived                                 | °C       | ERA5L                             |
| $W_c$           | Width of glacial valley at the location of station <sup>2</sup>                          | km       | QGIS                              |
| $\bar{W}_g$     | Mean width of glacier ( $A_g/L_g$ )                                                      | km       | RGI 7                             |
| $Z_s$           | Elevation of 30m resolution topography at the station                                    | m        | Alos World 3d                     |
| $\bar{Z}_{10}$  | Mean elevation of 30m resolution topography inside 10 km buffer of station               | m        | GEE and Alos World 3d             |
| $Z_{max}$       | Maximum elevation of glacier                                                             | m        | RGI7                              |
| $Z_{min}$       | Minimum elevation of glacier                                                             | m        | RGI7                              |
| $Z_{range}$     | $Z_{max} - Z_{min}$                                                                      | m        | RGI7                              |
| $\bar{Z}$       | Normalized station elevation, defined as $Z_s/(Z_{max} - Z_{min})$                       | unitless | RGI7 and Weather station metadata |

<sup>2</sup>For brevity, the symbol  $AR$  has been used in place of  $AR_{\sigma,1}$  throughout the main text.

<sup>2</sup> $W_c$  for on-glacier stations, was obtained using QGIS by measuring the width of RGI7 shape-file of the glacier measured perpendicular to the glacier centerline at the station location. For off-glacier stations in de-glaciated valleys, it was defined as the moraine-moraine distance at the station location from Google Earth Imagery, measured perpendicular to the central flow-line of the valley. For all other cases, was taken as  $\bar{W}_g$ .

**Supplementary Table S3 :** Details of the best-fit regression model discussed in Section 4.1.2. Values in parentheses denote the uncertainty in the last digits of the corresponding regression coefficients, expressed as their standard errors. For example, 25(5) indicates  $25 \pm 5$ . The correlation coefficient column shows the correlation between each model parameter and its associated predictor variable. T-statistics, defined as the ratio between the regression coefficient and its standard error, can be interpreted as the relative importance of a static variable in the multilinear regression.

| Model parameter | Static variable | Regression coefficient  | Correlation coefficient | T-statistics |
|-----------------|-----------------|-------------------------|-------------------------|--------------|
| $\bar{u}$       | $k$             | $25(5) \times 10^{-1}$  | 0.51                    | 4.90         |
|                 | $R_1$           | $45(8) \times 10^{-4}$  | -0.08                   | 5.63         |
|                 | $R_5$           | $-15(2) \times 10^{-4}$ | -0.42                   | 6.20         |
|                 | $AR$            | $11(2) \times 10^{-2}$  | -0.05                   | 5.67         |
| $s$             | $k$             | $13(9) \times 10^{-2}$  | 0.10                    | 1.41         |
|                 | $Z_s$           | $-17(5) \times 10^{-5}$ | 0.11                    | 3.13         |
|                 | $\bar{Z}_{10}$  | $22(6) \times 10^{-5}$  | 0.32                    | 3.62         |
| $\tau$          | $k$             | $73(49) \times 10^{-2}$ | 0.50                    | 1.49         |
|                 | $S_{0.1}$       | $19(14) \times 10^{-1}$ | 0.24                    | 1.33         |

**Supplementary Table S4 :** For each of the 28 stations, the RMSE between  $u^{pred}$  from the calibrated model (Section 4.2.1) and  $u^{obs}$  is presented. The RMSEs from the LOOCV model (Section 4.2.2) for the 28 left-out stations are also included, along with the corresponding RMSEs for ERA5L winds for comparison.

| Station Name    | RMSE ( $\text{ms}^{-1}$ ) |             |       |
|-----------------|---------------------------|-------------|-------|
|                 | Calibrated Model          | LOOCV Model | ERA5L |
| Arolla          | 0.65                      | 0.71        | 2.55  |
| Balcony         | 0.48                      | 0.57        | 2.61  |
| Bellavista      | 0.62                      | 0.69        | 2.71  |
| Bishop          | 0.51                      | 0.59        | 2.48  |
| Camp2           | 0.48                      | 0.54        | 0.38  |
| Chotta Shigri1  | 0.81                      | 0.85        | 1.98  |
| Chotta Shigri2  | 0.84                      | 0.91        | 1.96  |
| Djankuat        | 1.84                      | 1.98        | 4.82  |
| Drang Drung     | 0.72                      | 0.96        | 3.55  |
| Hintereisferner | 1.07                      | 1.18        | 3.09  |

|              |      |      |      |
|--------------|------|------|------|
| Kalapathar   | 1.07 | 1.14 | 1.64 |
| Kennikot     | 1.18 | 1.18 | 1.26 |
| Langenferner | 1.27 | 1.34 | 2.63 |
| Lirung       | 0.75 | 0.89 | 0.23 |
| Morimoto     | 0.58 | 0.6  | 1.3  |
| Place1       | 0.23 | 0.25 | 2.2  |
| Place2       | 0.49 | 0.54 | 2.35 |
| Place3       | 0.12 | 0.13 | 2.44 |
| Place4       | 0.56 | 0.6  | 2.21 |
| Pyramid      | 0.96 | 1.21 | 1.41 |
| Satopanth    | 0.43 | 0.43 | 0.77 |
| Schiaparelli | 0.27 | 0.32 | 1.63 |
| Southcol     | 0.16 | 0.18 | 2.2  |
| Trakarding   | 0.24 | 0.25 | 0.95 |
| Wear1        | 0.42 | 0.47 | 2.87 |
| Wear2        | 0.73 | 0.78 | 1.85 |
| Weisse       | 1.15 | 1.26 | 1.15 |
| Yala         | 0.57 | 0.62 | 0.39 |

**Supplementary Table S5 :** Comparison of the turbulent heat flux estimated using the simple bulk-aerodynamic model (Cuffey and Paterson, 2010). . The mean summertime air temperature  $T^{era}$  ( $^{\circ}\text{C}$ ), the dew-point temperature  $T_{dew}^{era}$  ( $^{\circ}\text{C}$ ), and the surface pressure P (Pa) at each station are obtained from ERA5. The vapor pressure e (Pa) and saturation vapor pressure  $e_s$  (Pa) is calculated with P, Tera and Tdew by using the equation described in (Bolton, 1980; Buck, 1981). Using the methods described in section 2.6, we estimate sensible heat flux  $Q_{shf}$  ( $\text{Wm}^{-2}$ ), latent heat flux  $Q_{lhf}$  ( $\text{Wm}^{-2}$ ) and the total turbulent heat flux  $Q_{thf} = Q_{shf} + Q_{lhf}$  ( $\text{Wm}^{-2}$ ) for each station. The fluxes obtained when the mean wind speed is taken from our model ( $\bar{u}^{pred}$ ), and those obtained directly from ERA5 ( $\bar{u}^{era}$ ), are compared with the same estimated using mean wind speed observed at the station ( $\bar{u}^{obs}$ ).

|            | Constants derived from ERA5L |                 |       |        |         | Mean wind speed |                  |                 | Sensible heat flux |                  |                 | Latent heat flux |                  |                 | Turbulent heat flux |                  |                 |
|------------|------------------------------|-----------------|-------|--------|---------|-----------------|------------------|-----------------|--------------------|------------------|-----------------|------------------|------------------|-----------------|---------------------|------------------|-----------------|
| Name       | $T^{era}$                    | $T_{dew}^{era}$ | e     | $e_s$  | P       | $\bar{u}^{obs}$ | $\bar{u}^{pred}$ | $\bar{u}^{era}$ | $Q_{shf}^{obs}$    | $Q_{shf}^{pred}$ | $Q_{shf}^{era}$ | $Q_{lhf}^{obs}$  | $Q_{lhf}^{pred}$ | $Q_{lhf}^{era}$ | $Q_{thf}^{obs}$     | $Q_{thf}^{pred}$ | $Q_{thf}^{era}$ |
| Arolla     | 7.4                          | -0.1            | 606.2 | 1026.7 | 71993.5 | 3.4             | 3.8              | 0.8             | 46.2               | 51.3             | 11.6            | -50.9            | -56.5            | -12.8           | -4.7                | -5.2             | -1.2            |
| Balcony    | -8.7                         | -3.5            | 471.8 | 291.3  | 50300.3 | 3.4             | 3.1              | 0.8             | -38.6              | -34.9            | -9.4            | 22.1             | 20.0             | 5.4             | -16.5               | -15.0            | -4.0            |
| Bellavista | 4.1                          | 0.9             | 650.4 | 816.8  | 72869.9 | 3.6             | 4.0              | 0.9             | 27.3               | 30.9             | 6.8             | -21.3            | -24.1            | -5.3            | 6.0                 | 6.8              | 1.5             |
| Bishop     | -6.5                         | -3.0            | 491.7 | 353.2  | 50665.5 | 3.2             | 3.0              | 0.7             | -27.0              | -25.7            | -6.3            | 15.8             | 15.0             | 3.7             | -11.2               | -10.7            | -2.6            |

|                |      |      |        |        |         |     |     |     |       |       |      |       |       |       |       |       |      |
|----------------|------|------|--------|--------|---------|-----|-----|-----|-------|-------|------|-------|-------|-------|-------|-------|------|
| Camp2          | -1.3 | -3.2 | 482.5  | 550.5  | 50563.6 | 1.1 | 1.3 | 0.8 | -1.8  | -2.1  | -1.3 | -2.7  | -3.2  | -1.9  | -4.5  | -5.3  | -3.3 |
| Chotta Shigri1 | 2.3  | -0.4 | 593.4  | 718.7  | 58103.9 | 2.4 | 2.1 | 0.8 | 8.1   | 7.0   | 2.8  | -10.8 | -9.3  | -3.7  | -2.7  | -2.3  | -0.9 |
| Chotta Shigri2 | 3.8  | 1.0  | 657.6  | 803.7  | 58176.7 | 2.6 | 1.9 | 0.8 | 15.0  | 11.0  | 4.5  | -13.7 | -10.0 | -4.1  | 1.4   | 1.0   | 0.4  |
| Djankuat       | 8.7  | 3.0  | 757.7  | 1125.6 | 71659.9 | 5.1 | 3.9 | 0.7 | 82.4  | 63.2  | 11.0 | -67.4 | -51.7 | -9.0  | 15.0  | 11.5  | 2.0  |
| Drang Drung    | 1.4  | -4.3 | 445.3  | 675.2  | 56415.5 | 4.2 | 4.1 | 0.7 | 8.4   | 8.1   | 1.4  | -34.6 | -33.3 | -5.8  | -26.2 | -25.2 | -4.4 |
| Hinterisferner | 3.4  | 0.4  | 629.7  | 778.9  | 72919.5 | 3.9 | 3.0 | 0.8 | 24.7  | 18.8  | 5.1  | -20.8 | -15.8 | -4.3  | 4.0   | 3.0   | 0.8  |
| Kalapathar     | 0.3  | -1.6 | 542.0  | 624.3  | 53165.7 | 2.0 | 1.8 | 0.9 | 0.8   | 0.7   | 0.4  | -5.8  | -5.3  | -2.6  | -5.0  | -4.6  | -2.2 |
| Kennikot       | 10.7 | 7.1  | 1009.0 | 1287.8 | 90928.8 | 2.0 | 0.8 | 0.9 | 49.6  | 20.2  | 21.7 | -19.7 | -8.0  | -8.6  | 29.9  | 12.2  | 13.1 |
| Langenferner   | 6.5  | 2.5  | 730.3  | 971.1  | 75768.8 | 3.4 | 2.5 | 0.8 | 43.1  | 31.4  | 9.7  | -29.0 | -21.1 | -6.6  | 14.1  | 10.2  | 3.2  |
| Lirung         | 5.5  | 1.9  | 702.7  | 902.9  | 55918.3 | 1.0 | 1.6 | 0.8 | 7.6   | 13.0  | 6.6  | -6.9  | -11.7 | -6.0  | 0.7   | 1.2   | 0.6  |
| Morimoto       | 1.5  | -0.3 | 598.0  | 680.7  | 53513.4 | 2.0 | 2.2 | 0.8 | 4.1   | 4.5   | 1.7  | -5.9  | -6.4  | -2.5  | -1.8  | -2.0  | -0.8 |
| Place1         | 10.7 | 4.7  | 852.8  | 1287.6 | 87208.1 | 3.0 | 3.0 | 0.8 | 71.5  | 71.7  | 18.5 | -46.2 | -46.3 | -12.0 | 25.3  | 25.4  | 6.6  |
| Place2         | 10.5 | 5.1  | 876.2  | 1272.0 | 87209.5 | 3.1 | 3.6 | 0.7 | 73.3  | 84.1  | 17.7 | -43.9 | -50.3 | -10.6 | 29.5  | 33.8  | 7.1  |
| Place3         | 11.1 | 5.4  | 895.2  | 1321.5 | 87207.7 | 3.2 | 3.2 | 0.8 | 79.9  | 80.4  | 19.2 | -48.8 | -49.1 | -11.8 | 31.1  | 31.3  | 7.5  |
| Place4         | 11.1 | 5.3  | 889.8  | 1321.3 | 87216.8 | 3.0 | 2.4 | 0.8 | 73.8  | 60.4  | 19.0 | -45.6 | -37.4 | -11.8 | 28.1  | 23.0  | 7.2  |
| Pyramid        | 1.0  | -1.5 | 547.2  | 659.1  | 53179.8 | 2.0 | 2.6 | 0.9 | 2.8   | 3.8   | 1.2  | -7.8  | -10.6 | -3.4  | -5.0  | -6.8  | -2.2 |
| Satopanth      | 5.6  | 0.8  | 645.3  | 912.5  | 57746.3 | 1.2 | 1.2 | 0.8 | 10.0  | 10.2  | 6.7  | -11.4 | -11.6 | -7.6  | -1.4  | -1.4  | -0.9 |
| Schiaparelli   | 7.0  | 3.5  | 783.5  | 999.3  | 96673.8 | 3.9 | 3.8 | 5.5 | 68.0  | 66.2  | 95.9 | -30.3 | -29.5 | -42.7 | 37.7  | 36.8  | 53.2 |
| Southcol       | -7.2 | -3.3 | 479.7  | 333.6  | 50518.7 | 3.0 | 2.9 | 0.8 | -28.1 | -27.5 | -7.6 | 15.7  | 15.4  | 4.2   | -12.3 | -12.1 | -3.3 |
| Trakarding     | 5.4  | 2.3  | 718.8  | 896.9  | 55669.7 | 1.6 | 1.6 | 0.8 | 12.4  | 12.1  | 5.8  | -10.2 | -10.0 | -4.8  | 2.2   | 2.1   | 1.0  |
| Weart1         | 10.9 | 6.4  | 964.0  | 1302.5 | 85446.5 | 3.5 | 3.8 | 0.6 | 82.8  | 91.3  | 14.2 | -41.8 | -46.1 | -7.2  | 41.0  | 45.2  | 7.0  |
| Weart2         | 8.4  | 4.9  | 865.5  | 1102.0 | 82942.2 | 2.5 | 3.2 | 0.6 | 44.2  | 57.0  | 11.1 | -20.8 | -26.9 | -5.3  | 23.4  | 30.1  | 5.9  |
| Weissee        | 3.3  | 2.1  | 710.0  | 771.9  | 74833.8 | 1.9 | 3.0 | 0.7 | 11.7  | 18.8  | 4.7  | -4.1  | -6.6  | -1.6  | 7.6   | 12.2  | 3.0  |
| Yala           | 1.7  | 2.2  | 715.6  | 690.4  | 55965.1 | 1.1 | 1.5 | 0.8 | 2.7   | 3.6   | 2.0  | 1.0   | 1.3   | 0.7   | 3.7   | 4.9   | 2.7  |

## References

- 40 Arigony-Neto, J., Jaña, R., Gonzalez, I., Schneider, C., and Temme, F.: Automatic Weather Station observations at Schiaparelli Glacier, Sep 2015 - Feb 2019, PANGAEA, <https://doi.org/10.1594/PANGAEA.958693>, in: Arigony-Neto, J et al. (2023): Meteorological Observations at Schiaparelli Glacier Automatic Weather Station (AWSglacier), Cordillera Darwin, Chile, 2013-2019 [dataset publication series]. PANGAEA, <https://doi.org/10.1594/PANGAEA.958694>, 2023.
- Bolton, D.: The Computation of Equivalent Potential Temperature, *Monthly Weather Review*, 108, 1046 – 1053, [https://doi.org/10.1175/1520-0493\(1980\)108<1046:TCOEPT>2.0.CO;2](https://doi.org/10.1175/1520-0493(1980)108<1046:TCOEPT>2.0.CO;2), 1980.
- 45 Buck, A. L.: New Equations for Computing Vapor Pressure and Enhancement Factor, *Journal of Applied Meteorology and Climatology*, 20, 1527 – 1532, [https://doi.org/10.1175/1520-0450\(1981\)020<1527:NEFCVP>2.0.CO;2](https://doi.org/10.1175/1520-0450(1981)020<1527:NEFCVP>2.0.CO;2), 1981.
- Buri, P., Truffer, M., Fochesatto, J., and Aschwanden, A.: Automatic weather station data from the debris- covered Kennicott Glacier, Alaska (May-Aug 2019), <https://doi.org/10.5281/zenodo.6424158>, 2022.
- 50 Conrad, V.: Usual formulas of continentality and their limits of validity, *Eos, Transactions American Geophysical Union*, 27, 663–664, 1946.
- Cuffey, K. and Paterson, W.: *The Physics of Glaciers*, Academic Press, ISBN 9780080919126, <https://books.google.co.in/books?id=Jca2v1u1EKEC>, 2010.
- Galos, S. P.: Weather Station raw-data Langenferner-Felsköpfl 2012-2015, <https://doi.org/10.1594/PANGAEA.902771>, 2019.
- Gorelick, N., Hancher, M., Dixon, M., Ilyushchenko, S., Thau, D., and Moore, R.: Google Earth Engine: Planetary-scale geospatial analysis for everyone, *Remote Sensing of Environment*, <https://doi.org/10.1016/j.rse.2017.06.031>, 2017.
- 55 ICIMOD: Meteorological data from Yala Base Camp automatic weather station, [Data set], <https://doi.org/10.26066/RDS.26859>, accessed: 2025-07-22, 2016.
- ICIMOD and Utrecht University: Micromet station: Lirung glacier, [Data set], <https://doi.org/10.26066/RDS.1972409>, accessed: 2025-07-22, 2020a.
- 60 ICIMOD and Utrecht University: Micromet station: Morimoto, [Data set], <https://doi.org/10.26066/RDS.1972408>, accessed: 2025-07-22, 2020b.
- Mandal, A., Angchuk, T., Azam, M. F., Ramanathan, A., Wagnon, P., Soheb, M., and Singh, C.: An 11-year record of wintertime snow-surface energy balance and sublimation at 4863 m asl on the Chhota Shigri Glacier moraine (western Himalaya, India), *The Cryosphere*, 16, 3775–3799, 2022.
- 65 Matthews, T. and Coauthors: Going to Extremes: Installing the World’s Highest Weather Stations on Mount Everest, *Bulletin of the American Meteorological Society*, 101, E1870–E1890, <https://doi.org/10.1175/BAMS-D-19-0198.1>, 2020.
- QGIS Development Team: QGIS Geographic Information System, Open Source Geospatial Foundation Project, <http://qgis.osgeo.org>, 2024.
- RGI7.0-Consortium: Randolph Glacier Inventory - A Dataset of Global Glacier Outlines, Version 7.0, <https://doi.org/10.5067/f6jmovy5navz>, 2023.
- 70 Shea, J. M.: Regional-scale distributed modelling of glacier meteorology and melt, southern Coast Mountains, Canada, Ph.D. thesis, University of British Columbia, <https://doi.org/http://dx.doi.org/10.14288/1.0069481>, 2010.
- Stocker-Waldhuber, M., Emprechtinger, M., and Fischer, A.: Continuous meteorological observations at weather station HEF (Hintereis-ferner), Ötztal Alps, Austria, in 2012, <https://doi.org/10.1594/PANGAEA.809095>, 2013.
- Stocker-Waldhuber, M., Seiser, B., and Fischer, A.: Meteorological data Weißseespitze/Austria, 2017-10-31 to 2018-09-30, PANGAEA, <https://doi.org/10.1594/PANGAEA.939824>, 2022.
- 75

Strasser, U. and Marke, T.: Continuous meteorological observations at station Bella Vista in 2016, PANGAEA, <https://doi.org/10.1594/PANGAEA.879211>, 2017.

Tadono, T., Ishida, H., Oda, F., Naito, S., Minakawa, K., and Iwamoto, H.: Precise Global DEM Generation by ALOS PRISM, ISPRS Annals of the Photogrammetry, Remote Sensing and Spatial Information Sciences, II-4, 71–76, <https://doi.org/10.5194/isprsannals-II-4-71-2014>, 2014.
